# Supplementary figures and images for: Food-Borne Nanocarriers for Calcium Delivery: A New Choice for Nutrient Supplements
Source: MDPI journal article supplement (doi:10.3390/foods11030308), 2022-01-24

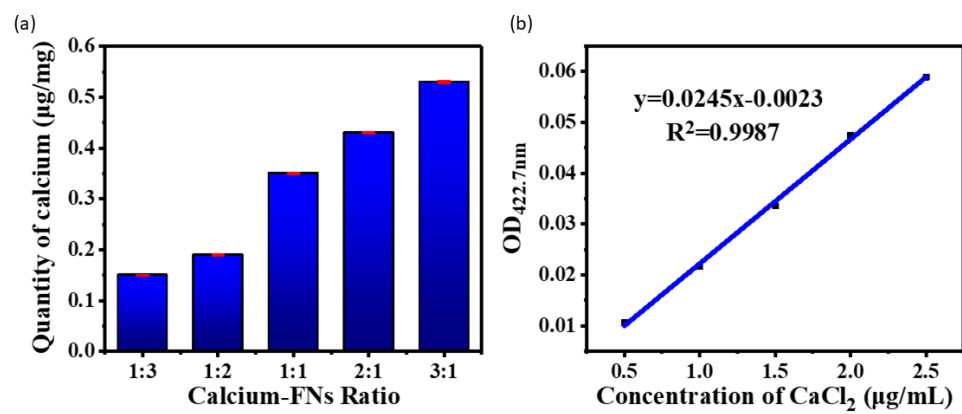

**Figure S1.** (a) Determination of calcium binding capacity and (b) calcium standard curve.

Supplement: s1 [file s1]
